# Supplementary material for: White matter hyperintensities and the risk of vascular dementia: a systematic review and meta-analysis
Source: PeerJ journal article supplement (doi:10.7717/peerj.19460), 2025-06-16

Filled funnel plot with pseudo 95% confidence limits

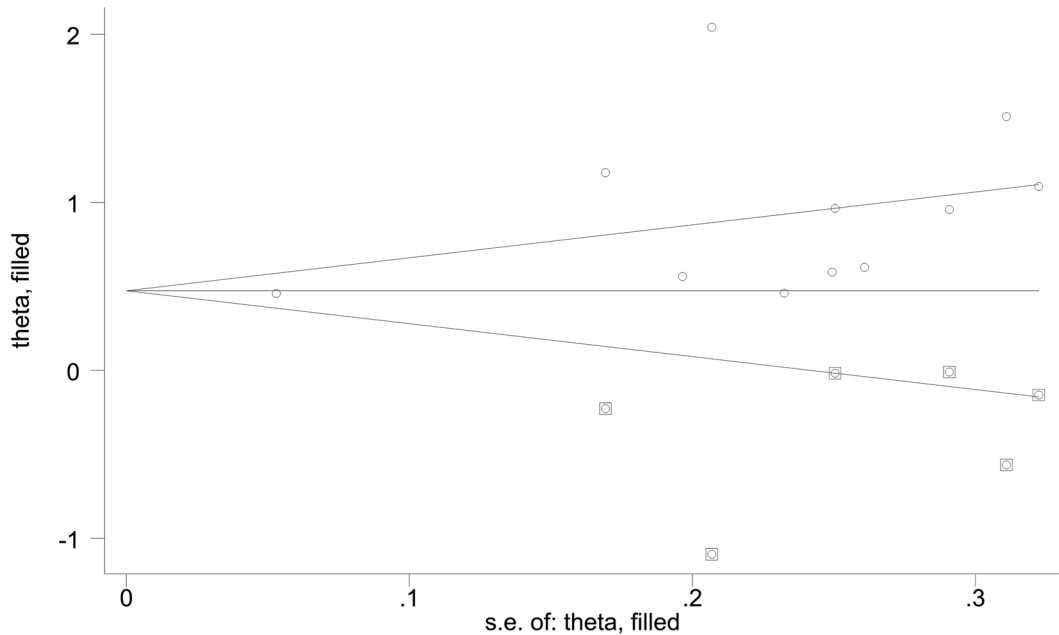

Supplement: Supplementary_Figure_2.pdf [file Supplementary_Figure_2.pdf]
